# Supplementary material for: Alcohol and the risk for latent autoimmune diabetes in adults: results based on Swedish ESTRID study
Source: PubMed Central journal article supplement (PMC4190680; doi:10.1530/eje-14-0403), 2014-11
Supplement: supp_EJE-14-0403_Supplementary_table_1.pdf [file supp_EJE-14-0403_Supplementary_table_1.pdf]

**Supplementary Table 1.** HR of autoimmune diabetes in adults stratified by median GADA levels, in relation to frequency of alcohol intake, HUNT study, 1984-2008

| <b>Autoimmune diabetes in adults</b>                       |             |                                      |                  |                                    |                  |
|------------------------------------------------------------|-------------|--------------------------------------|------------------|------------------------------------|------------------|
|                                                            |             | <i>Low GADA</i><br>( $\leq$ median*) |                  | <i>High GADA</i><br>( $>$ median*) |                  |
|                                                            | Person-year | No. cases                            | HR†<br>(95% CI)  | No. cases                          | HR†<br>(95% CI)  |
| <b>Frequency of alcohol intake during the last 14 days</b> |             |                                      |                  |                                    |                  |
| Abstainers                                                 | 103,167     | 5                                    | 0.30 (0.10-0.86) | 11                                 | 1.63 (0.74-3.57) |
| <1 time                                                    | 353,919     | 39                                   | Reference        | 20                                 | Reference        |
| 1-4 times                                                  | 451,268     | 19                                   | 0.54 (0.29-0.99) | 22                                 | 0.93 (0.48-1.80) |
| $\geq$ 5 times                                             | 44,113      | 2                                    | 0.48 (0.11-2.07) | 4                                  | 1.24 (0.35-4.33) |

\* Median of GADA=0.16 index value in relation to standard serum, † HR controlled for age and sex, BMI, Smoking, family history of diabetes, education and physical activity
